# Supplementary material
Source: MDPI journal article supplement (https://www.mdpi.com/2073-4433/15/10/1162)
Supplement: s1 [file atmosphere-3188737-supplementary.pdf › atmosphere-3188737-supplementary.pdf]

# Supplementary Materials: Characterization and sources of VOCs during PM<sub>2.5</sub> pollution periods in a typical city of the Yangtze River Delta

## Contents of this document

### Tables:

Table S1. Relevant VOCs parameters used in this study.

Table S2. Comparison of meteorological parameters and air pollutants concentrations between morning time (6:00–10:00) of December 7 and 8, 2019.

### Figures:

Figure S1. Flowchart for this study.

Figure S2. Chromatogram of the sample collected on December 7, 2019 at 8:00 (a), Chromatogram of the sample collected on December 8, 2019 at 8:00 (b).

Figure S3. Diurnal variation (a) and composition (b) of OH loss rate ( $L_{OH}$ ) in N-P, P-P1 and P-P2 period.

**Scheme S1.** Relevant VOCs parameters used in this study.

| Compound               | MDL (ppt) | $K_{OH} \times 10^{12}$ | A <sup>b</sup>         | B <sup>b</sup> | n <sup>b</sup> | FAC (%)        | FVOC <sub>ti</sub> (%) |
|------------------------|-----------|-------------------------|------------------------|----------------|----------------|----------------|------------------------|
| <b>Alkanes</b>         |           |                         |                        |                |                |                |                        |
| Ethane *               | 64        | 0.20                    | $1.49 \times 10^{-17}$ | 499            | 2              | – <sup>d</sup> | –                      |
| Propane *              | 48        | 0.96                    | $1.65 \times 10^{-17}$ | 87             | 2              | –              | –                      |
| <i>i</i> -Butane *     | 44        | 1.97                    | $1.17 \times 10^{-17}$ | –213           | 2              | –              | –                      |
| <i>n</i> -Butane *     | 30        | 2.14                    | $1.81 \times 10^{-17}$ | –114           | 2              | –              | –                      |
| <i>i</i> -Pentane *    | 12        | 3.60 <sup>c</sup>       |                        |                |                | –              | –                      |
| <i>n</i> -Pentane *    | 30        | 3.49                    | $2.52 \times 10^{-17}$ | –158           | 2              | –              | –                      |
| 2,2-Dimethylbutane *   | 3         | 1.89                    | $3.37 \times 10^{-11}$ | 809            |                | –              | –                      |
| Cyclopentane           | 8         | 4.62                    | $2.73 \times 10^{-17}$ | –214           | 2              | –              | –                      |
| 2,3-Dimethylbutane     | 9         | 5.58                    | $1.66 \times 10^{-17}$ | –407           | 2              | –              | –                      |
| 2-Methylpentane *      | 8         | 5.20 <sup>c</sup>       |                        |                |                | –              | –                      |
| 3-Methylpentane *      | 12        | 5.20 <sup>c</sup>       |                        |                |                | –              | –                      |
| <i>n</i> -Hexane       | 8         | 4.79                    | $2.54 \times 10^{-14}$ | 112            | 1              | –              | –                      |
| 2,3-Dimethylpentane    | 4         | 5.10 <sup>c</sup>       |                        |                |                | 0.06           | 14                     |
| Methylcyclopentane     | 7         | 5.10 <sup>c</sup>       |                        |                |                | 0.17           | 10                     |
| Cyclohexane            | 1         | 6.54                    | $3.26 \times 10^{-17}$ | –262           | 2              | 0.17           | 14                     |
| 2,4-Dimethylpentane    | 1         | 4.77 <sup>c</sup>       |                        |                |                | 0.06           | 14                     |
| 3-Methylhexane         | 9         | 5.10 <sup>c</sup>       |                        |                |                | 0.06           | 14                     |
| 2,2,4-Trimethylpentane | 4         | 3.05                    | $2.35 \times 10^{-17}$ | –140           | 2              | 0.06           | 17                     |
| <i>n</i> -Heptane      | 6         | 6.53                    | $1.95 \times 10^{-17}$ | –406           | 2              | 0.06           | 14                     |
| Methylcyclohexane      | 1         | 9.64 <sup>c</sup>       |                        |                |                | 2.7            | 20                     |
| 2,3,4-Trimethylpentane | 2         | 6.60 <sup>c</sup>       |                        |                |                | 0.06           | 17                     |
| 2-Methylheptane        | 2         | 8.30 <sup>c</sup>       |                        |                |                | 0.5            | 10                     |
| 3-Methylheptane        | 2         | 8.60 <sup>c</sup>       |                        |                |                | 0.5            | 10                     |
| <i>n</i> -Octane       | 6         | 7.76                    | $2.72 \times 10^{-17}$ | –361           | 2              | 0.06           | 17                     |
| <i>n</i> -Nonane       | 9         | 9.43                    | $2.53 \times 10^{-17}$ | –436           | 2              | 1.5            | 20                     |
| <i>n</i> -Decane       | 6         | 10.62                   | $3.17 \times 10^{-17}$ | –406           | 2              | 2              | 22                     |
| <b>Alkenes</b>         |           |                         |                        |                |                |                |                        |
| Ethylene *             | 35        | 9.32                    | $1.96 \times 10^{-12}$ | –438           |                | –              | –                      |
| Propene *              | 41        | 29.15                   | $4.85 \times 10^{-12}$ | –504           |                | –              | –                      |

| Compound                | MDL (ppt) | $K_{OH} \times 10^{12}$ | A <sup>b</sup>         | B <sup>b</sup> | n <sup>b</sup> | FAC (%) | FVOC <sub>ri</sub> (%) |
|-------------------------|-----------|-------------------------|------------------------|----------------|----------------|---------|------------------------|
| 1-Butene *              | 4         | 34.51                   | $6.55 \times 10^{-12}$ | -467           | -              | -       | -                      |
| trans-2-Butene          | 5         | 71.51                   | $1.01 \times 10^{-11}$ | -550           | -              | -       | -                      |
| cis-2-Butene            | 8         | 62.24                   | $1.10 \times 10^{-11}$ | -487           | -              | -       | -                      |
| 3-Methyl-1-butene       | 2         | 35.46                   | $5.32 \times 10^{-12}$ | -533           | -              | -       | -                      |
| 1-Pentene               | 2         | 31.40 <sup>c</sup>      |                        |                | -              | -       | -                      |
| 2-Methyl-1-butene       | 3         | 61.00 <sup>c</sup>      |                        |                | -              | -       | -                      |
| Isoprene *              | 6         | 108.17                  | $2.70 \times 10^{-11}$ | -390           | 2              | 50      |                        |
| trans-2-Pentene         | 2         | 67.00 <sup>c</sup>      |                        |                | -              | -       | -                      |
| cis-2-Pentene           | 1         | 65.00 <sup>c</sup>      |                        |                | -              | -       | -                      |
| 2-Methyl-2-butene       | 2         | 95.23                   | $1.92 \times 10^{-11}$ | -450           | -              | -       | -                      |
| Cyclopentene            | 8         | 67.00 <sup>c</sup>      |                        |                | 4              | 94      |                        |
| 4-Methyl-1-pentene      | 5         | -                       |                        |                | -              | -       | -                      |
| 1-Hexene                | 1         | 37.00 <sup>c</sup>      |                        |                | -              | -       | -                      |
| trans-2-Hexene          | 3         | -                       |                        |                | -              | -       | -                      |
| cis-2-Hexene            | 2         | -                       |                        |                | -              | -       | -                      |
| 3-Hexene                | 1         | -                       |                        |                | -              | -       | -                      |
| $\alpha$ -Pinene        | 1         | 57.10                   | $1.21 \times 10^{-11}$ | -436           | -              | -       | -                      |
| $\beta$ -Pinene         | 1         | 81.68                   | $1.55 \times 10^{-11}$ | -467           | -              | -       | -                      |
| <b>Alkyne</b>           |           |                         |                        |                |                |         |                        |
| Acetylene *             | 54        | 0.80 <sup>c</sup>       |                        |                | -              | -       | -                      |
| <b>Aromatics</b>        |           |                         |                        |                |                |         |                        |
| Benzene *               | 15        | 1.17                    | $2.33 \times 10^{-12}$ | 193            | 2.0            | 10      |                        |
| Toluene *               | 9         | 3.93                    | $1.18 \times 10^{-12}$ | -338           | 5.4            | 12      |                        |
| Ethylbenzene *          | 9         | 7.00 <sup>c</sup>       |                        |                | 5.4            | 15      |                        |
| <i>m,p</i> -Xylene *    | 15        | 18.65                   | $1.87 \times 10^{-11}$ | 0              | 3.2            | 34      |                        |
| <i>o</i> -Xylene *      | 7         | 13.60 <sup>c</sup>      |                        |                | 5.0            | 26      |                        |
| Styrene *               | 30        | 58.00 <sup>c</sup>      |                        |                | -              | -       | -                      |
| Isopropylbenzene        | 1         | 6.30 <sup>c</sup>       |                        |                | 4.0            | 13      |                        |
| <i>n</i> -Propylbenzene | 1         | 5.80 <sup>c</sup>       |                        |                | 1.6            | 12      |                        |
| <i>m</i> -Ethyltoluene  | 4         | 18.60 <sup>c</sup>      |                        |                | 6.3            | 31      |                        |
| <i>p</i> -Ethyltoluene  | 1         | 11.80 <sup>c</sup>      |                        |                | 2.5            | 21      |                        |
| <i>o</i> -Ethyltoluene  | 1         | 11.90 <sup>c</sup>      |                        |                | 5.6            | 23      |                        |
| 1,3,5-Trimethylbenzene  | 2         | 56.70 <sup>c</sup>      |                        |                | 2.9            | 74      |                        |
| 1,2,4-Trimethylbenzene  | 6         | 32.50 <sup>c</sup>      |                        |                | 2.0            | 58      |                        |
| 1,2,3-Trimethylbenzene  | 2         | 32.70 <sup>c</sup>      |                        |                | 3.6            | 51      |                        |

<sup>a</sup>  $K_{OH}$  represents the average reaction rates with OH from the calculated results ( $\text{cm}^3 \text{ molecule}^{-1} \text{ s}^{-1}$ ), we calculated T dependent  $K_{OH}$  in this study, for alkanes, the recommended temperature-dependent expression is shown in Equation 1, while for alkenes, alkynes, and aromatics, Equation 2 is used.

$$K_{OH} = AT^n e^{-B/T} \quad (1)$$

$$K_{OH} = Ae^{-B/T} \quad (2)$$

<sup>b</sup> A represents the Arrhenius constant ( $\text{cm}^3 \text{ molecule}^{-1} \text{ s}^{-1}$ ), B is the ratio of apparent activation energy to molar gas constant (K), and n is a coefficient, the value of A, B, and n are obtained from Atkinson and Arey (2003).

<sup>c</sup> The  $K_{OH}$  values at 298 K were used for compounds whose A and B parameters were not queried.

<sup>d</sup> - represents that the relevant parameters for the compound were not calculated.

\* Compounds used for PMF analysis.

**Table S2.** Comparison of meteorological parameters and air pollutants concentrations between morning time (6:00-10:00) of December 7 and 8, 2019.

|                                         | December 7               | December 8               |
|-----------------------------------------|--------------------------|--------------------------|
| T (°C)                                  | 11.6 ± 2.3               | 13.1 ± 1.0               |
| RH (%)                                  | 45.4 ± 12.3              | 45.5 ± 4.6               |
| Wind speed (m s <sup>-1</sup> )         | 0.3 ± 0.2                | 0.8 ± 0.4                |
| Wind direction                          | Southeast winds dominate | Southeast winds dominate |
| PM <sub>10</sub> (µg m <sup>-3</sup> )  | 63.4 ± 1.9               | 53.0 ± 5.1               |
| PM <sub>2.5</sub> (µg m <sup>-3</sup> ) | 33.8 ± 1.3               | 35.8 ± 6.1               |
| SO <sub>2</sub> (µg m <sup>-3</sup> )   | 7.8 ± 2.6                | 8.8 ± 3.9                |
| CO (mg m <sup>-3</sup> )                | 0.92 ± 0.1               | 0.94 ± 0.05              |
| NO <sub>2</sub> (µg m <sup>-3</sup> )   | 49.4 ± 6.7               | 54.6 ± 3.9               |
| O <sub>3</sub> (µg m <sup>-3</sup> )    | 7.0 ± 8.0                | 10.4 ± 14.0              |
| Alkanes (ppb)                           | 36.0 ± 16.3              | 18.3 ± 5.6               |
| Alkenes (ppb)                           | 6.7 ± 1.8                | 3.7 ± 0.7                |
| Alkyne (ppb)                            | 3.1 ± 0.3                | 2.7 ± 0.7                |
| Aromatics (ppb)                         | 13.7 ± 14.0              | 1.0 ± 0.5                |
| TVOCs (ppb)                             | 59.4 ± 31.9              | 25.7 ± 6.8               |

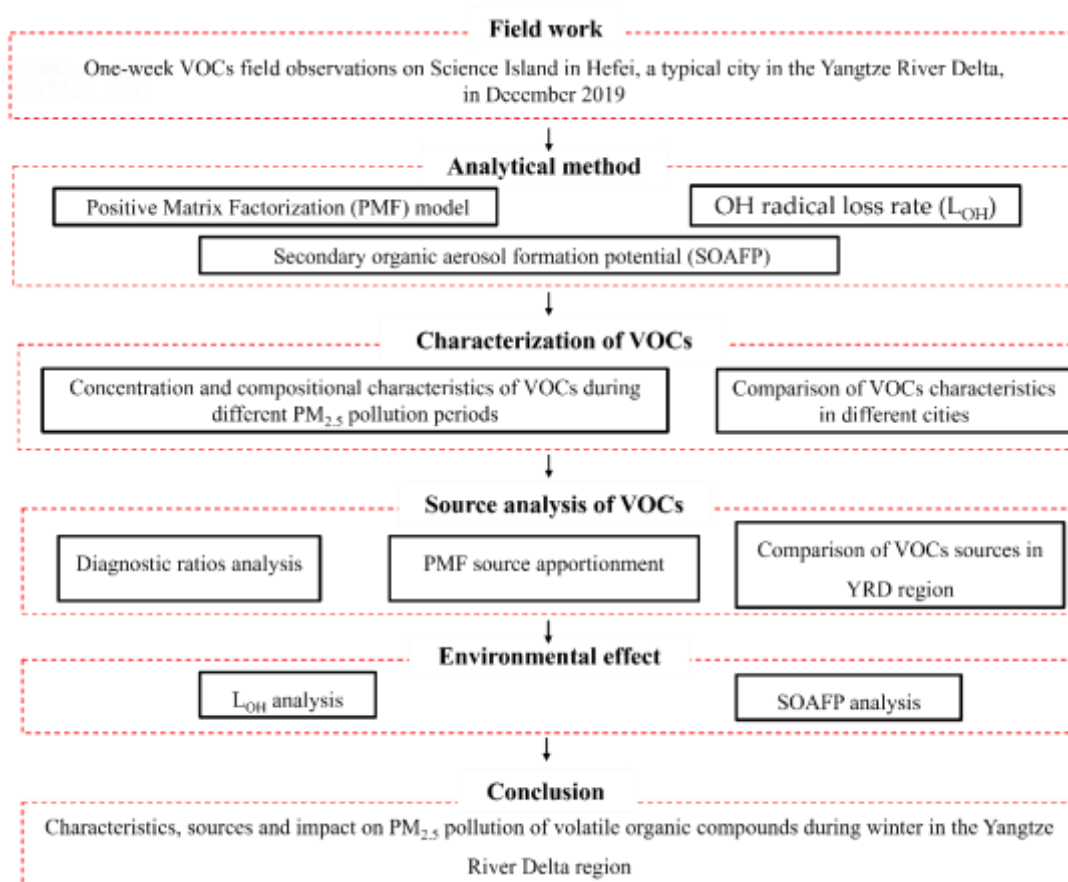

Figure S1. Flowchart for this study.

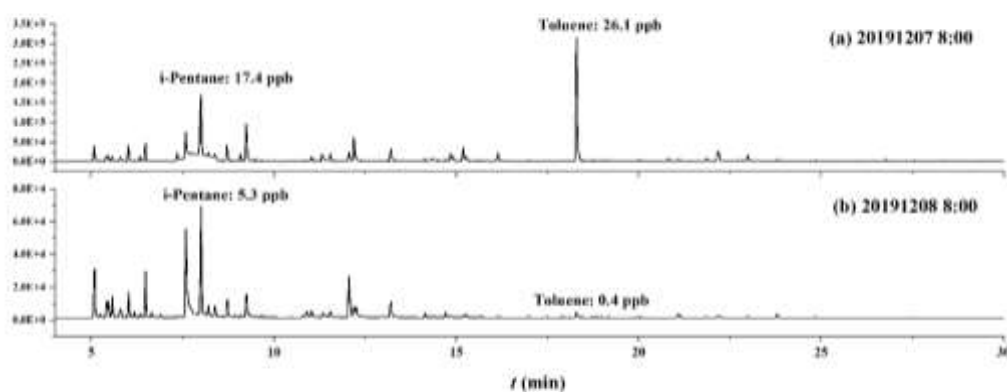

Figure S2. Chromatogram of the sample collected on December 7, 2019 at 8:00 (a), Chromatogram of the sample collected on December 8, 2019 at 8:00 (b).

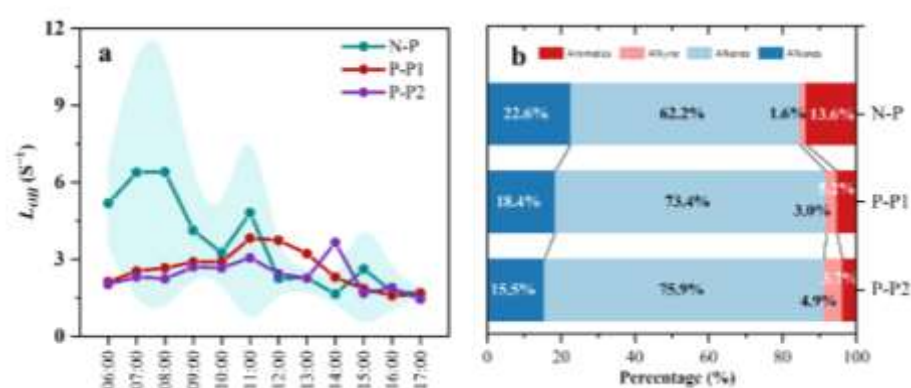

**Figure S3.** Diurnal variation (a) and composition (b) of OH loss rate ( $L_{OH}$ ) in N-P, P-P1 and P-P2 period.
